# Supplementary material for: Deliberation and polarization: a multi-disciplinary review
Source: Frontiers journal article supplement (doi:10.3389/fpos.2023.1127372), 2023-06-29
Supplement: Table_1.DOCX [file Table_1.DOCX]

**Supplemental material: List of coded publications**

1. Amsalem, E., Merkley, E., & Loewen, P. J. (2022). Does talking to the other side reduce inter-party hostility? Evidence from three studies. *Political Communication* 39(1): 61-78.
2. Baba, K., Amanuma, E., & Kosugi, M. (2021). Attitude Changes of Stakeholders towards Climate Change Adaptation Policies in Agricultural Sector by Online Deliberation. *Climate* 9(5): 75.
3. Baron, H., Blair, R., Choi, D. D., Gamboa, L., Gottlieb, J., Robinson, A. L., & West, E. A. (2021). Can Americans Depolarize? Assessing the effects of reciprocal group reflection on partisan polarization. https://doi.org/10.31219/osf.io/3x7z8
4. Bekafigo, M. A., Stepanova, E. V., Eiler, B. A., Noguchi, K., & Ramsey, K. L. (2019). The effect of group polarization on opposition to Donald Trump. *Political Psychology* 40(5): 1163-1178.
5. Bilali, R., Vollhardt, J. R., & Rarick, J. R. D. (2017). Modeling collective action through media to promote social change and positive intergroup relations in violent conflicts. *Journal of Experimental Social Psychology* 68: 200-211.
6. Binder, A. R., Dalrymple, K. E., Brossard, D., & Scheufele, D. A. (2009). The soul of a polarized democracy: Testing theoretical linkages between talk and attitude extremity during the 2004 presidential election. *Communication Research* 36(3): 315-340.
7. Bogaards, M., & Deutsch, F. (2015). Deliberation by, with, and for University Students. *Journal of Political Science Education* 11(2): 221-232.
8. Brauer, M., & Judd, C. M. (1996). Group polarization and repeated attitude expressions: A new take on an old topic. *European review of social psychology* 7(1): 173-207.
9. Brauer, M., Judd, C. M., & Jacquelin, V. (2001). The communication of social stereotypes: The effects of group discussion and information distribution on stereotypic appraisals. *Journal of Personality and Social Psychology* 81(3): 463-475.
10. Buder, J., Rabl, L., Feiks, M., Badermann, M., & Zurstiege, G. (2021). Does negatively toned language use on social media lead to attitude polarization?. *Computers in Human Behavior* 116: 106663.
11. Caluwaerts, D., & Reuchamps, M. (2014). Does inter-group deliberation foster inter-group appreciation? Evidence from two experiments in Belgium. *Politics* 34(2): 101-115.
12. Çelik, A., & Göker, Z. (2021). Dialogue in polarized societies: Women’s encounters with multiple others. *New Perspectives on Turkey* 64: 31-54.
13. Crott, H. W., Szilvas, K., & Zuber, J. A. (1991). Group decision, choice shift, and polarization in consulting, political, and local political scenarios: An experimental investigation and theoretical analysis. *Organizational Behavior and Human Decision Processes* 49(1): 22-41.
14. Cvetkovich, G., & Baumgardner, S. R. (1973). Attitude polarization: The relative influence of discussion group structure and reference group norms. *Journal of Personality and Social Psychology* 26(2): 159 -165.
15. Edwards, A. (2013). (How) do participants in online discussion forums create ‘echo chambers’?: The inclusion and exclusion of dissenting voices in an online forum about climate change. *Journal of Argumentation in Context* 2(1): 127-150.
16. Esterling, K. M., Fung, A., & Lee, T. (2021). When deliberation produces persuasion rather than polarization: Measuring and modeling small group dynamics in a field experiment. *British Journal of Political Science* 51(2): 666-684.
17. Farrar, C., Green, D. P., Green, J. E., Nickerson, D. W., & Shewfelt, S. (2009). Does discussion group composition affect policy preferences? Results from three randomized experiments. *Political Psychology* 30(4): 615-647.
18. Fishkin, J. S., He, B., Luskin, R. C., & Siu, A. (2010). Deliberative democracy in an unlikely place: Deliberative polling in China. *British Journal of Political Science* 40(2): 435-448.
19. Fishkin, J. S., Mayega, R. W., Atuyambe, L., Tumuhamye, N., Ssentongo, J., Siu, A., & Bazeyo, W. (2017). Applying Deliberative Democracy in Africa: Uganda's First Deliberative Polls. *Daedalus* 146(3): 140-154.
20. Fishkin, J., Siu, A., Diamond, L., & Bradburn, N. (2021). Is deliberation an antidote to extreme partisan polarization? Reflections on “America in one room”. *American Political Science Review* 115(4): 1464-1481.
21. Friedkin, N. E. (1999). Choice shift and group polarization. *American Sociological Review* 64(6): 856-875.
22. Gastil, J., Black, L., & Moscovitz, K. (2008). Ideology, attitude change, and deliberation in small face-to-face groups. *Political Communication* 25(1): 23-46.
23. Ghimire, R., Anbar, N., & Chhetri, N. B. (2021). The impact of public deliberation on climate change opinions among US citizens. *Frontiers in Political Science* 13.
24. Grönlund, K., Herne, K., Jäske, M., & Värttö, M. (2022). Can politicians and citizens deliberate together? Evidence from a local deliberative mini‐public. *Scandinavian Political Studies* 45(4): 410-432.
25. Grönlund, K., Herne, K., & Setälä, M. (2015). Does enclave deliberation polarize opinions?. *Political Behavior* 37(4): 995-1020.
26. Grönlund, K., Herne, K., & Setälä, M. (2017). Empathy in a citizen deliberation experiment. *Scandinavian Political Studies* 40(4): 457-480.
27. Grönlund, K., Herne, K., Strandberg, K., & Söderlund, P. (2021). Disagreement and Deliberation: Evidence from Three Deliberative Mini-Publics. *Political Behavior*: 1-23.
28. Hamlett, P. W., & Cobb, M. D. (2006). Potential solutions to public deliberation problems: Structured deliberations and polarization cascades. *Policy Studies Journal* 34(4): 629-648.
29. Harris, B. D., Morgan, C. V., & Gibbs, B. G. (2014). Evidence of political moderation over time: Utah’s immigration debate online. *new media & society* 16(8): 1309-1331.
30. Herne, K., Christensen, H. S., & Grönlund, K. (2019). The influence of political knowledge on opinion polarization in citizen deliberation. *Political Research Exchange* 1(1): 1-23.
31. Himmelroos, S., & Christensen, H. S. (2020). The potential of deliberative reasoning: Patterns of attitude change and consistency in cross-cutting and like-minded deliberation. *Acta Politica* 55(2): 135-155.
32. Hwang, H., Kim, Y., & Huh, C. U. (2014). Seeing is believing: Effects of uncivil online debate on political polarization and expectations of deliberation. *Journal of Broadcasting & Electronic Media* 58(4): 621-633.
33. Johansson, A., Lindahl, K. B., & Zachrisson, A. (2022). Exploring prospects of deliberation in intractable natural resource management conflicts. *Journal of Environmental Management* 315: 115205.
34. Jones, D. A. (2013). The polarizing effect of a partisan workplace. *PS: Political Science & Politics* 46(1): 67-73.
35. Kalla, J. L., & Broockman, D. E. (2020). Reducing exclusionary attitudes through interpersonal conversation: Evidence from three field experiments. *American Political Science Review* 114(2): 410-425.
36. Kaplan, M. F., & Miller, C. E. (1987). Group decision making and normative versus informational influence: Effects of type of issue and assigned decision rule. *Journal of Personality and social psychology* 53(2): 306-313.
37. Kim, J. (2021). The Effects and Antecedents of Perceived Fairness in the Deliberative Process for Sustainable Citizens’ Participation. *Sustainability* 13(14): 7735.
38. Kim, P., Kim, J., & Yim, M. S. (2020). How deliberation changes public opinions on nuclear energy: South Korea's deliberation on closing nuclear reactors. *Applied Energy*, *270*, 115094.
39. Kogan, N., & Wallach, M. A. (1966). Modification of a judgmental style through group interaction. Journal of Personality and Social Psychology 4(2): 165-174.
40. Lawrence, E., Sides, J., & Farrell, H. (2010). Self-segregation or deliberation? Blog readership, participation, and polarization in American politics. *Perspectives on Politics* 8(1): 141-157.
41. Levendusky, M. S., Druckman, J. N., & McLain, A. (2016). How group discussions create strong attitudes and strong partisans. *Research & Politics* 3(2).
42. Levendusky, M. S., & Stecula, D. A. (2021). *We need to talk: How cross-party dialogue reduces affective polarization*. Cambridge University Press.
43. Lindell, M., Bächtiger, A., Grönlund, K., Herne, K., Setälä, M., & Wyss, D. (2017). What drives the polarisation and moderation of opinions? Evidence from a Finnish citizen deliberation experiment on immigration. *European Journal of Political Research* 56(1): 23-45.
44. Liu, J. H., & Latané, B. (1998). Extremitization of attitudes: Does thought-and discussion-induced polarization cumulate?. *Basic and Applied Social Psychology* 20(2): 103-110.
45. Luskin, R. C., Sood, G., Fishkin, J. S., & Hahn, K. S. (2022). Deliberative Distortions? Homogenization, Polarization, and Domination in Small Group Discussions. *British Journal of Political Science*: 1-21.
46. McAvoy, P., & McAvoy, G. E. (2021). Can debate and deliberation reduce partisan divisions? Evidence from a study of high school students. *Peabody Journal of Education* 96(3): 275-284.
47. Mendelberg, T., & Oleske, J. (2000). Race and public deliberation. *Political Communication* 17(2): 169-191.
48. Moernaut, R., Mast, J., Temmerman, M., & Broersma, M. (2022). Hot weather, hot topic. Polarization and sceptical framing in the climate debate on Twitter. *Information, Communication & Society* 25(8): 1047-1066.
49. Muradova, L. (2021). Seeing the other side? Perspective-taking and reflective political judgements in interpersonal deliberation. *Political Studies* 69(3): 644-664.
50. Myers, C. D. (2022). The Dynamics of Social Identity: Evidence from Deliberating Groups. *Political Psychology* 43(2): 237-254.
51. Myers, D. G., & Bishop, G. D. (1970). Discussion effects on racial attitudes. *Science* 169(3947): 778-779.
52. Nordbrandt, M. (2022). Affective Polarization in Cross-Cutting Communication Networks: Offline and Online Evidence from Spain. *Frontiers in Political Science* 4: 1-16.
53. O’Malley, E., Farrell, D. M., & Suiter, J. (2020). Does talking matter? A quasi-experiment assessing the impact of deliberation and information on opinion change. *International Political Science Review* 41(3): 321-334.
54. Paler, L., Marshall, L., & Atallah, S. (2020). How cross-cutting discussion shapes support for ethnic politics: Evidence from an experiment in Lebanon. *Quarterly Journal of Political Science* 15(1): 33-71.
55. Paluck, E. L. (2010). Is it better not to talk? Group polarization, extended contact, and perspective taking in eastern Democratic Republic of Congo. *Personality and Social Psychology Bulletin* 36(9): 1170-1185.
56. PytlikZillig, L. M., Hutchens, M. J., Muhlberger, P., Gonzalez, F. J., & Tomkins, A. J. (2018). Attitude change and polarization. In *Deliberative public engagement with science* (pp. 61-87). Springer, Cham.
57. Radnitz, S. (2018). Historical narratives and post-conflict reconciliation: An experiment in Azerbaijan. *Conflict Management and Peace Science* 35(2): 154-174.
58. Schkade, D., Sunstein, C. R., & Hastie, R. (2007). What happened on deliberation day. *Calif. L. Rev.* 95: 915-940.
59. Shen, F., & Yu, W. (2021). Reducing political polarization in Hong Kong: a pilot experiment of deliberation. *Japanese Journal of Political Science* 22(4): 233-247.
60. Sia, C. L., Tan, B. C., & Wei, K. K. (2002). Group polarization and computer-mediated communication: Effects of communication cues, social presence, and anonymity. *Information Systems Research* 13(1): 70-90.
61. Siegel, S., & Zajonc, R. B. (1967). Group risk taking in professional decisions. *Sociometry* 30(4): 339-349.
62. Strandberg, K. (2015). Designing for democracy?: An experimental study comparing the outcomes of citizen discussions in online forums with those of online discussions in a forum designed according to deliberative principles. *European Political Science Review* 7(3): 451-474.
63. Strandberg, K., Backström, K., Berg, J., & Karv, T. (2021). Democratically Sustainable Local Development? The Outcomes of Mixed Deliberation on a Municipal Merger on Participants’ Social Trust, Political Trust, and Political Efficacy. *Sustainability* *13*(13): 7231.
64. Strandberg, K., & Berg, J. (2020). When reality strikes: Opinion changes among citizens and politicians during a deliberation on school closures. *International Political Science Review* 41(4): 567-583.
65. Strandberg, K., Himmelroos, S., & Grönlund, K. (2019). Do discussions in like-minded groups necessarily lead to more extreme opinions? Deliberative democracy and group polarization. *International Political Science Review* 40(1): 41-57.
66. Suiter, J., M Farrell, D., Harris, C., & Murphy, P. (2022). Measuring epistemic deliberation on polarized issues: The case of abortion provision in Ireland. *Political Studies Review* 20(4): 630-647.
67. Thompson, A. G., Escobar, O., Roberts, J. J., Elstub, S., & Pamphilis, N. M. (2021). The importance of context and the effect of information and deliberation on opinion change regarding environmental issues in citizens’ juries. *Sustainability* 13(17): 1-21.
68. Thompson, M. S., Judd, C. M., & Park, B. (2000). The consequences of communicating social stereotypes. *Journal of Experimental Social Psychology* 36(6): 567-599.
69. Ugarriza, J. E., & Nussio, E. (2017). The effect of perspective‐giving on postconflict reconciliation. An experimental approach. *Political Psychology* 38(1): 3-19.
70. Ugarriza, J. E., & Trujillo-Orrego, N. (2020). The ironic effect of deliberation: what we can (and cannot) expect in deeply divided societies. *Acta Politica* 55(2): 221-241.
71. Van Swol, L. M. (2009). Extreme members and group polarization. *Social Influence* 4(3): 185-199.
72. van Swol, L. M., Bloomfield, E. F., Chang, C. T., & Willes, S. (2022). Fostering climate change consensus: the role of intimacy in group discussions. *Public Understanding of Science* 31(1): 103-118.
73. Vinokur, A., & Burnstein, E. (1978). Depolarization of attitudes in groups. *Journal of Personality and Social Psychology* 36(8): 872-885.
74. Wahl, R. (2021). Not Monsters After All: How Political Deliberation Can Build Moral Communities Amidst Deep Difference. *Journal of Deliberative Democracy* 17(1): 160-168.
75. Wojcieszak, M. (2010). ‘Don’t talk to me’: effects of ideologically homogeneous online groups and politically dissimilar offline ties on extremism. *New Media & Society* 12(4): 637-655.
76. Wojcieszak, M. (2011). Deliberation and attitude polarization. *Journal of Communication* 61(4): 596-617.
77. Wojcieszak, M., & Price, V. (2010). Bridging the divide or intensifying the conflict? How disagreement affects strong predilections about sexual minorities. *Political Psychology* 31(3): 315-339.
78. Wojcieszak, M., Sobkowicz, P., Yu, X., & Bulat, B. (2022). What Information Drives Political Polarization? Comparing the Effects of In-group Praise, Out-group Derogation, and Evidence-based Communications on Polarization. *The International Journal of Press/Politics* 27(2): 325-352.
79. Ali, F. Z., Sparviero, S., & Pierson, J. (2022). Discursive Participation and Group Polarization on Facebook: The Curious Case of Pakistan’s Nationalism and Identity. *International Journal of Communication* 16: 2149–2173.
80. Zhang, K. (2019). Encountering dissimilar views in deliberation: Political knowledge, attitude strength, and opinion change. *Political Psychology* 40(2): 315-333.
